# Supplementary material for: Physico-Chemical Characteristics of Spodumene Concentrate and Its Thermal Transformations
Source: MDPI journal article supplement (doi:10.3390/ma14237423), 2021-12-03
Supplement: s1 [file s1]

## **SUPPLEMENTARY MATERIAL**

### **Physico-chemical Characteristics of Spodumene Concentrate and its Thermal Transformations**

**Allen Yushark Fosu<sup>1</sup>, Ndue Kanari <sup>1</sup>, Danièle Bartier<sup>1</sup>, Harrison Hodge<sup>2</sup>, James Vaughan<sup>2</sup>, Alexandre Chagnes<sup>1,\*</sup>**

<sup>1</sup> Université de Lorraine, CNRS, GeoRessources, F-54000 Nancy, France [allen.fosu@univ-lorraine.fr](mailto:allen.fosu@univ-lorraine.fr) (A.Y.F.); [ndue.kanari@univ-lorraine.fr](mailto:ndue.kanari@univ-lorraine.fr) (N.K.); [daniele.bartier@univ-lorraine.fr](mailto:daniele.bartier@univ-lorraine.fr) (D.B) ; [alexandre.chagnes@univ-lorraine.fr](mailto:alexandre.chagnes@univ-lorraine.fr) (A.C.)

<sup>2</sup> School of Chemical Engineering, The University of Queensland, Brisbane, QLD 4072, Australia; [james.vaughan@uq.edu.au](mailto:james.vaughan@uq.edu.au)

\* Correspondence: [alexandre.chagnes@univ-lorraine.fr](mailto:alexandre.chagnes@univ-lorraine.fr); Tel.: +33(0)-372-744-544

**Table S1:** Calculated elemental assay of major elements by MLA and their corresponding oxides.

| Element | Wt%   | Oxides                         | Wt%   |
|---------|-------|--------------------------------|-------|
| Al      | 11.58 | Al <sub>2</sub> O <sub>3</sub> | 21.87 |
| Ca      | 1.94  | CaO                            | 2.76  |
| Fe      | 2     | Fe <sub>2</sub> O <sub>3</sub> | 2.86  |
| K       | 1.34  | K <sub>2</sub> O               | 3.23  |
| Li      | 1.96  | Li <sub>2</sub> O              | 4.22  |
| Mg      | 0.5   | MgO                            | 0.83  |
| Mn      | 0.22  | MnO                            | 0.41  |
| Na      | 0.76  | Na <sub>2</sub> O              | 2.05  |
| P       | 0.17  | P <sub>2</sub> O <sub>5</sub>  | 0.22  |
| S       | 0.07  | SO <sub>3</sub>                | 0.18  |
| Si      | 29.47 | SiO <sub>2</sub>               | 63.15 |

**Table S2:** MLA data for degree of mineral liberation in concentrate used to generate Figure 4

| Mineral      | Liberation degree |
|--------------|-------------------|
| Pyrite       | 98.3              |
| Quartz       | 98.8              |
| Orthoclase   | 93.7              |
| Albite       | 98.2              |
| Anorthite    | 97.2              |
| Biotite      | 98.4              |
| Muscovite    | 96.0              |
| Chlorite     | 97.2              |
| Amphibole    | 96.9              |
| Spessartine  | 94.1              |
| Spodumene    | 98.8              |
| Tantalite_Mn | 96.6              |
| Calcite      | 95.8              |
| Apatite      | 96.2              |

**Table S3.** Standard deviation on atomic percent of elemental composition of spodumene in concentrate.

| Element | Atomic % |      |      |      |      |      |      |      |      |      |      |      |      | SD*    |
|---------|----------|------|------|------|------|------|------|------|------|------|------|------|------|--------|
| Al      | 11.3     | 11.3 | 11.6 | 11.5 | 11.5 | 11.5 | 11.4 | 11.3 | 11.3 | 11.4 | 11.4 | 11.2 | 11.3 | 0.1036 |
| Si      | 23.9     | 23.9 | 23.7 | 23.7 | 23.8 | 23.6 | 23.7 | 23.8 | 23.9 | 23.6 | 23.6 | 23.8 | 23.7 | 0.1029 |
| O       | 64.8     | 64.8 | 64.7 | 64.7 | 64.7 | 64.7 | 64.7 | 64.8 | 64.8 | 64.7 | 64.7 | 64.8 | 64.7 | 0.0231 |
| Fe      |          |      |      |      |      | 0.2  |      | 0.2  |      | 0.2  | 0.3  | 0.2  | 0.5  | 0.0539 |
| Mn      |          |      |      |      |      |      | 0.2  |      |      |      |      |      |      |        |

**Table S4.** Standard deviation on atomic percent of elemental composition of amphiboles in concentrate.

| Element | Atomic % |      |      |      |      |      |      |      |      |      |      |      |      |      |      | SD*    |
|---------|----------|------|------|------|------|------|------|------|------|------|------|------|------|------|------|--------|
| Mg      | 6.1      | 5.5  | 4.6  | 7.3  | 10.5 | 6.4  | 10.3 | 9.6  | 7.1  | 4.2  | 8.6  | 6.0  | 4.3  |      | 5.6  | 2.1346 |
| Al      | 0.2      | 0.2  | 3.6  | 0.4  | 4.6  | 2.8  | 3.2  | 1.7  | 3.3  | 4.8  | 9.1  |      | 5.2  | 9.5  |      | 2.9863 |
| Si      | 19.7     | 19.7 | 21.8 | 19.9 | 18.3 | 19.2 | 3.8  | 19.6 | 18.0 | 17.1 | 12.8 | 19.7 | 16.8 | 14.8 | 19.6 | 4.3916 |
| Ca      | 9.6      | 9.6  | 3.2  | 9.5  | 0.4  | 5.0  | 0.3  | 4.7  | 5.0  | 3.9  |      | 9.6  | 4.8  | 0.2  | 9.7  | 3.6591 |
| Fe      | 3.6      | 3.9  | 3.0  | 2.2  | 2.9  | 4.5  | 20.3 | 2.8  | 4.8  | 6.9  | 7.4  | 3.7  | 6.2  | 6.3  | 4.2  | 4.3969 |
| O       | 60.8     | 60.9 | 62.1 | 60.6 | 60.4 | 61.2 | 58.4 | 60.8 | 60.7 | 61.0 | 60.1 | 60.8 | 60.8 | 61.3 | 60.9 | 0.7813 |
| Na      |          |      | 0.8  |      | 1.3  | 0.5  |      | 0.4  | 0.8  | 0.9  | 1.0  |      | 1.1  |      |      | 0.2947 |
| K       |          |      | 1.0  |      | 1.4  | 0.4  |      | 0.3  | 0.4  | 1.0  | 1.0  |      | 0.5  |      |      | 0.4113 |
| Cr      |          |      |      |      | 0.3  |      | 2.5  | 0.2  |      |      | 0.2  |      |      |      |      | 1.1491 |
| Mn      |          |      |      |      |      | 0.2  | 1.2  |      |      | 0.2  |      | 0.2  | 0.2  | 8.0  |      | 3.1233 |

**Table S5.** Standard deviation on atomic percent of elemental composition of quartz in concentrate.

| Element | Atomic % |      |      |      |      |      |      |      |      |      | SD* |
|---------|----------|------|------|------|------|------|------|------|------|------|-----|
| Si      | 33.3     | 33.3 | 33.3 | 33.3 | 33.3 | 33.3 | 33.3 | 33.3 | 33.3 | 33.3 | 0.0 |
| O       | 66.7     | 66.7 | 66.7 | 66.7 | 66.7 | 66.7 | 66.7 | 66.7 | 66.7 | 66.7 | 0.0 |

**Table S6.** Standard deviation on atomic percent of elemental composition of albite in concentrate.

| Element | Atomic % |      |      |      |      |      |      |      | SD*    |
|---------|----------|------|------|------|------|------|------|------|--------|
| Na      | 5.5      | 7.3  | 7.0  | 6.7  | 7.0  | 7.0  | 6.7  | 5.5  | 0.6861 |
| Al      | 5.4      | 7.8  | 7.7  | 7.8  | 7.7  | 7.6  | 7.7  | 5.4  | 1.0706 |
| Si      | 26.0     | 23.1 | 23.4 | 23.2 | 23.5 | 23.5 | 23.3 | 26.0 | 1.2354 |
| O       | 63.0     | 61.7 | 61.9 | 61.8 | 61.9 | 61.9 | 61.9 | 63.0 | 0.5219 |
| Ca      | 0.1      | 0.2  | 0.1  | 0.3  |      |      | 0.2  | 0.1  | 0.0579 |

**Table S7.** Standard deviation on atomic percent of elemental composition of mica in concentrate.

| Element | Atomic % |      |      | SD*    |
|---------|----------|------|------|--------|
| Al      | 15.0     | 15.0 | 15.1 | 0.0557 |
| Si      | 17.7     | 17.5 | 17.5 | 0.13   |
| K       | 4.9      | 5.1  | 5.3  | 0.1823 |
| Fe      | 0.9      | 0.9  | 0.8  | 0.0702 |
| O       | 61.6     | 61.4 | 61.4 | 0.0985 |

**Table S8.** Standard deviation on atomic percent of elemental composition of hematite in concentrate.

| Element | Atomic % |      |      |      |      | SD*    |
|---------|----------|------|------|------|------|--------|
| Fe      | 37.9     | 40.0 | 38.1 | 38.7 | 38.9 | 0.8418 |
| O       | 60.1     | 60.0 | 60.2 | 60.2 | 60.1 | 0.0728 |
| Si      | 1.3      |      | 1.0  | 1.0  | 0.6  | 0.2971 |
| Ca      | 0.4      |      |      |      |      |        |
| Mn      | 0.4      |      |      |      |      |        |
| Al      |          |      | 0.8  | 0.4  | 0.4  | 0.2136 |

**Table S9.** Standard deviation on atomic percent of elemental composition of apatite in concentrate.

| Element | Atomic % |      |      |      | SD*     |
|---------|----------|------|------|------|---------|
| F       | 7.9      | 8.1  | 7.9  | 8.6  | 0.3320  |
| P       | 14.5     | 14.6 | 14.5 | 14.6 | 0.0455  |
| Ca      | 20.4     | 19.8 | 20.1 | 20.2 | 0.2443  |
| Mn      | 0.3      | 0.6  | 0.5  |      | 0.15875 |
| O       | 56.9     | 56.9 | 57.0 | 56.6 | 0.1656  |

SD\* represents the standard deviation on measured atomic percent of elements in mineral phases of the concentrate.



















**Table S18.** Atomic percentage of some mineral phases identified by SEM-EDS at 900 °C.

| Elem<br>ents | Spot<br>"1" | Spot<br>"2" | Spot<br>"3" | Spot<br>"4" | Spot<br>"5" | Spot<br>"7" | Spot<br>"9" |
|--------------|-------------|-------------|-------------|-------------|-------------|-------------|-------------|
| O            | 64.8        | 60.6        | 61.8        | 66.7        | 61.9        | 60.0        | 56.9        |
| Al           | 11.2        | 0.4         | 7.4         |             | 7.7         |             |             |
| Si           | 23.8        | 19.6        | 23.5        | 33.3        | 23.4        |             |             |
| Fe           | 0.3         | 2.8         |             |             |             | 40.0        |             |
| Mg           |             | 6.8         |             |             |             |             |             |
| Ca           |             | 9.6         |             |             | 0.1         |             | 20.2        |
| Mn           |             | 0.3         |             |             |             |             |             |
| Na           |             |             | 0.1         |             | 7.0         |             |             |
| K            |             |             | 6.5         |             |             |             |             |
| F            |             |             |             |             |             |             | 8.6         |
| P            |             |             |             |             |             |             | 14.6        |
| Sn           |             |             |             |             |             |             |             |

**Table S19.** Atomic percentage of some mineral phases identified by SEM-EDS at 950 °C.

| Elem<br>ents | Spot<br>"1" | Spot<br>"2" | Spot<br>"3" | Spot<br>"4" | Spot<br>"6" | Spot<br>"7" | Spot<br>"9" |
|--------------|-------------|-------------|-------------|-------------|-------------|-------------|-------------|
| O            | 64.8        | 60.9        | 61.5        | 66.7        | 2.1         | 60.1        | 56.9        |
| Al           | 11.5        | 9.5         | 14.9        |             | 15.9        | 0.4         |             |
| Si           | 23.7        | 14.8        | 17.8        | 33.3        | 17.7        | 0.6         |             |
| Fe           |             | 4.5         | 0.7         |             | 0.2         | 38.9        |             |
| Mg           |             |             |             |             |             | 0.05        |             |
| Ca           |             | 0.3         |             |             | 0.2         |             | 19.8        |
| Mn           |             | 9.9         |             |             |             |             | 0.6         |
| Na           |             |             | 0.9         |             | ---         |             |             |
| K            |             |             | 4.3         |             | 2.3         |             |             |
| F            |             |             |             |             |             |             | 8.1         |
| P            |             |             |             |             |             |             | 14.6        |

**Table S20.** Atomic percentage of some mineral phases identified by SEM-EDS at 1000 °C.

| Elem<br>ents | Spot<br>"1" | Spot<br>"2" | Spot<br>"3,5&6" | Spot<br>"4" |
|--------------|-------------|-------------|-----------------|-------------|
| O            | 64.6        | 60.7        | 61.8            | 66.7        |
| Al           | 11.1        | 3.3         | 15.9            |             |
| Si           | 23.6        | 18.0        | 17.7            | 33.3        |
| Fe           | 0.4         | 4.8         | 0.2             |             |
| Mg           |             | 7.1         |                 |             |
| Ca           |             | 5.0         | 0.2             |             |
| Mn           |             |             |                 |             |
| Na           | 0.3         | 0.8         | 2.1             |             |
| K            |             | 0.4         | 2.3             |             |
| Sn           |             |             |                 |             |

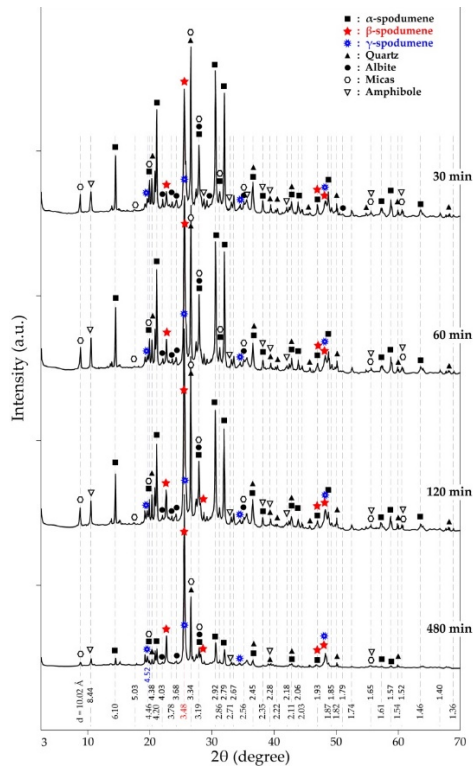

(a)

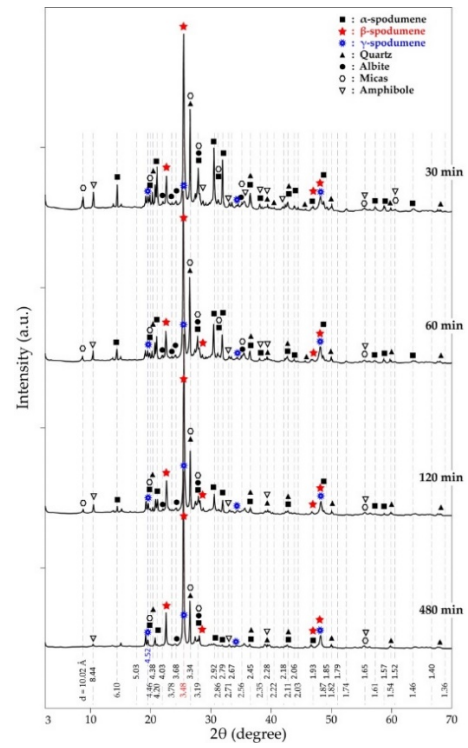

(b)

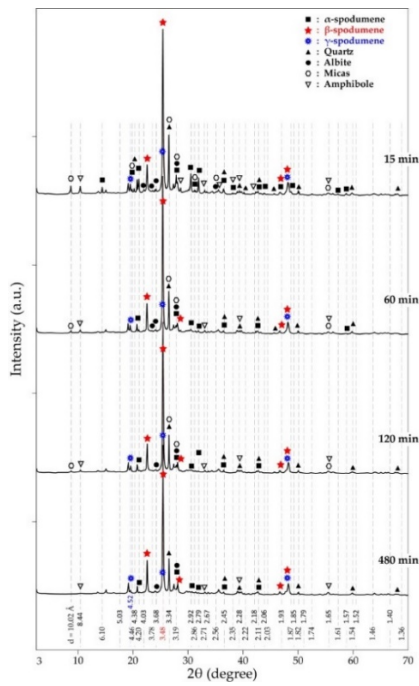

(c)

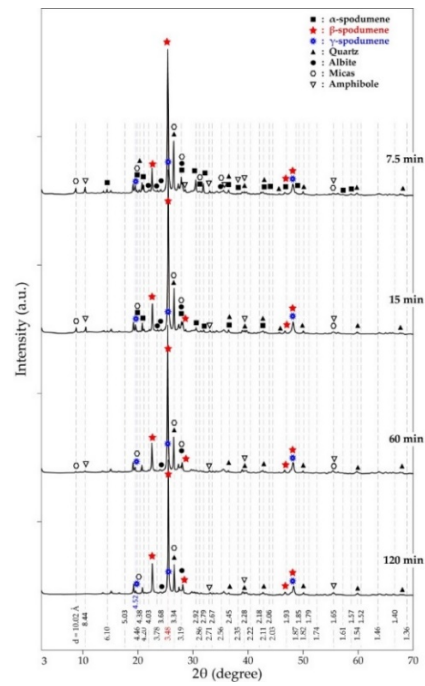

(d)

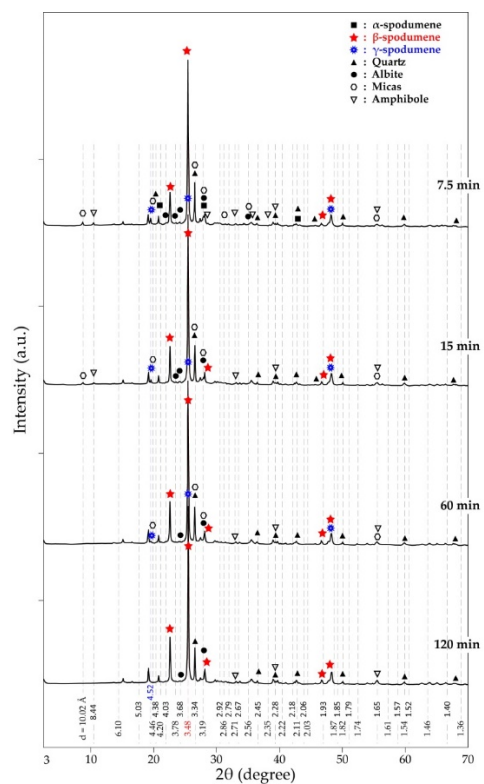

(e)

**Figure S9.** XRD patterns of residues obtained during treatment of concentrate in air as a function of residence time at 925 °C (a), 950 °C (b), 975 °C (c), 1000 (d), 1025 °C (e).

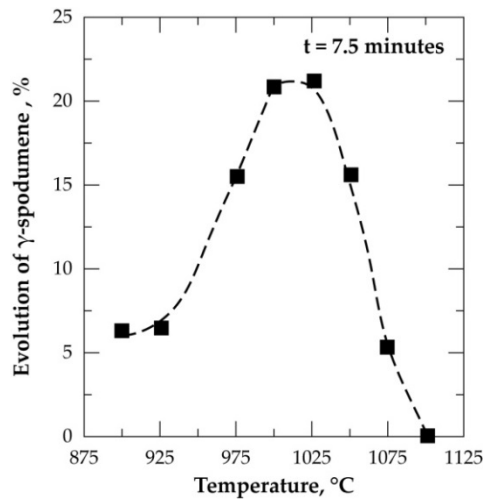

(a)

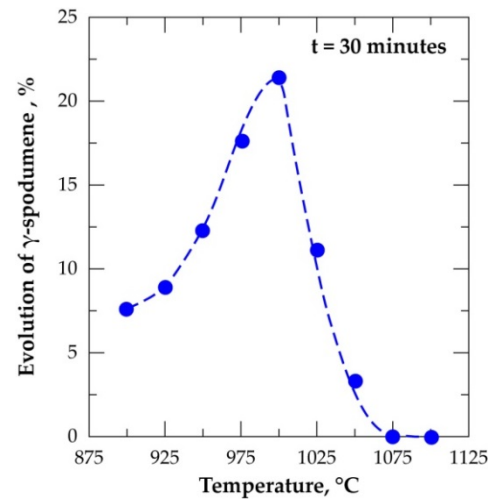

(b)

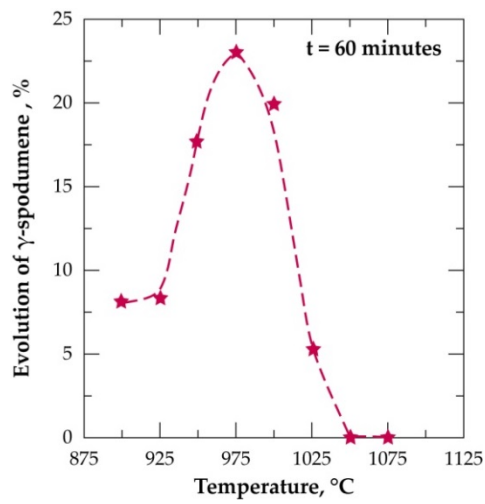

(c)

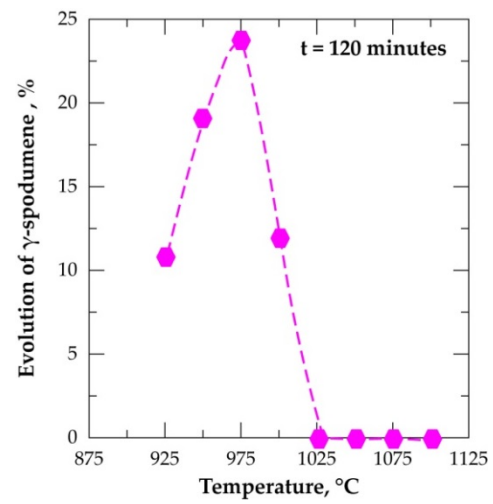

(d)

**Figure S10.** Evolution of the relative  $\gamma$ -spodumene content  $[(\gamma/(\alpha+\beta+\gamma)*100)]$  during treatment as a function of temperature for residence times: (a) 7.5 minutes, (b) 30 minutes, (c) 60 minutes and (d) 120 minutes

**Table S21.** Data for determination of apparent rate constants,  $k_1$  for  $\alpha$ -decay from Equation (3)

| Time/min | % $\alpha(t)$ |       |       |       |        | ln $\alpha(t)$ |       |       |       |        |
|----------|---------------|-------|-------|-------|--------|----------------|-------|-------|-------|--------|
|          | 900°C         | 925°C | 950°C | 975°C | 1000°C | 900°C          | 925°C | 950°C | 975°C | 1000°C |
| 7.5      |               | 88.07 |       | 46.73 | 24.44  |                | 4.48  |       | 3.84  | 3.2    |
| 15       |               | 75.33 |       | 32.8  | 9.76   |                | 4.32  |       | 3.49  | 2.28   |
| 30       |               | 79.42 | 55.66 | 18.2  | 3.42   |                | 4.37  | 4.02  | 2.9   | 1.23   |
| 60       | 88.64         | 75.2  | 43.04 | 5.89  | 0      | 4.48           | 4.32  | 3.76  | 1.77  |        |
| 120      | 84.77         | 67.06 | 24.47 | 3.71  | 0      | 4.44           | 4.21  | 3.2   | 1.31  |        |
| 240      | 77.78         | 51.2  | 15.01 | 0     | 0      | 4.35           | 3.94  | 2.71  |       |        |
| 480      | 75.09         | 33.92 | 4.51  | 0     | 0      | 4.32           | 3.52  | 1.51  |       |        |

**Table S22:** Data for determination of apparent rate constants,  $k_2$  for  $\gamma$ -decay from Equation (4)

| Time/min | % $\gamma(t)$ |        |        | ln $\gamma(t)$ |        |        |
|----------|---------------|--------|--------|----------------|--------|--------|
|          | 1000°C        | 1025°C | 1050°C | 1000 °C        | 1025°C | 1050°C |
| 7.5      | 21.01         | 21.17  | 15.63  | 3.04           | 3.05   | 2.75   |
| 15       | 20.63         | 7.18   | 7.14   | 3.03           | 1.97   | 1.97   |
| 30       | 21.58         | 11.31  | 3.42   | 3.07           | 2.43   | 1.23   |
| 60       | 19.88         | 5.3    | 0      | 3              | 1.67   |        |
| 120      | 12.02         | 0      | 0      | 2.49           |        |        |
| 240      | 7.47          | 0      | 0      | 2.01           |        |        |
| 480      | 0             | 0      | 0      |                |        |        |

**Table S23:** Data for calculating apparent activation energy for  $\alpha$ -decay from Equation (5)

| Temp/°C | Ea for $\alpha$ conversion to $\gamma$ and $\beta = 652$ KJmol |        |          |
|---------|----------------------------------------------------------------|--------|----------|
|         | 10000/Temp (K)                                                 | $k_1$  | ln $k_1$ |
| 900     | 8.53                                                           | 0.0004 | -7.824   |
| 925     | 8.35                                                           | 0.0019 | -6.266   |
| 950     | 8.18                                                           | 0.0054 | -5.221   |
| 975     | 8.01                                                           | 0.0224 | -3.799   |
| 1000    | 7.86                                                           | 0.085  | -2.465   |

**Table S24:** Data for calculating apparent activation energy for  $\gamma$ -decay from Equation (5)

| Temp/°C | Ea for $\gamma$ conversion to $\beta = 731$ KJmol |        |       |
|---------|---------------------------------------------------|--------|-------|
|         | 10000/Temp (K)                                    | $k_2$  | ln K  |
| 1000    | 7.86                                              | 0.0048 | -5.34 |
| 1025    | 7.70                                              | 0.0192 | -3.95 |
| 1050    | 7.56                                              | 0.065  | -2.73 |
